# Supplementary material
Source: PubMed Central journal article supplement (PMC3093657)
Supplement: NIHMS274331-supplement-Supp_Fig_S1-S3___Table_S1.pdf [file NIHMS274331-supplement-Supp_Fig_S1-S3___Table_S1.pdf]

| Protein name           | RAPDF      | Atomic KBP | DFIRE-A    | DFIRE-A1.45 | DFIRE-A1.70 | DFIRE-B    | 4B OPT POT |
|------------------------|------------|------------|------------|-------------|-------------|------------|------------|
| <b>4-state reduced</b> |            |            |            |             |             |            |            |
| 1ctf                   | 1/3.26b    | 1/3.53     | 1/3.86     | 1/3.33      | 1/4.01      | 1/3.03     | 2/2.32     |
| 1r69                   | 1/3.49     | 1/3.76     | 1/4.23     | 1/3.76      | 1/4.10      | 1/2.95     | 2/2.80     |
| 1sn3                   | 1/3.26     | 1/3.50     | 1/3.79     | 1/3.83      | 1/3.13      | 1/3.40     | 1/2.69     |
| 2cro                   | 1/2.93     | 1/2.91     | 1/3.29     | 1/2.97      | 1/3.24      | 2/2.74     | 1/2.46     |
| 3icb                   | 1/2.22     | 1/2.41     | 4/2.28c    | 1/2.15      | 4/2.29      | 24/1.68    | 1/1.99     |
| 4pti                   | 1/3.12     | 1/3.47     | 1/3.62     | 1/3.54      | 1/3.16      | 1/3.15     | 1/3.00     |
| 4rxn                   | 1/2.79     | 1/3.12     | 1/3.33     | 1/2.78      | 1/3.42      | 19/1.88    | 1/2.67     |
| <b>fisa</b>            |            |            |            |             |             |            |            |
| 1fc2                   | 497/-2.74  | 413/-1.05  | 254/0.23   | 406/-0.91   | 60/1.05     | 1/2.76     | 496/-2.34  |
| 1hdd-C                 | 17/2.00    | 25/1.78    | 1/4.50     | 1/3.77      | 1/4.45      | 1/6.76     | 3/2.10     |
| 2cro                   | 14/1.93    | 24/1.64    | 1/6.33     | 1/5.47      | 1/6.08      | 1/7.84     | 62/1.11    |
| 4icb                   | 1/3.89     | 6/2.46     | 1/6.91     | 1/6.34      | 1/6.96      | 1/8.47     | 1/3.27     |
| <b>fisa_casp</b>       |            |            |            |             |             |            |            |
| 1bg8-A                 | 1/4.39     | 2/2.84     | 1/5.35     | 1/5.13      | 1/4.92      | 1/3.82     | 815/-0.46  |
| 1bl0                   | 1/3.19     | 215/0.76   | 1/4.50     | 1/4.01      | 1/4.32      | 3/2.27     | 813/-3.20  |
| 1jwe                   | 1/4.69     | 4/2.64     | 1/6.26     | 1/5.96      | 1/5.94      | 1/4.81     | 602/0.005  |
| <b>lmds</b>            |            |            |            |             |             |            |            |
| 1b0n-B                 | 359/-0.45  | 74/1.03    | 430/-1.17  | 398/-0.82   | 438/-1.33   | 261/0.03   | 441/0.18   |
| 1bba                   | 501/-11.11 | 500/-3.51  | 501/-16.28 | 501/-18.34  | 501/-11.78  | 501/-21.38 | 470/-1.61  |
| 1fc2                   | 501/-7.75  | 501/-8.86  | 501/-5.72  | 501/-6.32   | 501/-4.19   | 441/-1.22  | 501/-3.48  |
| 1ctf                   | 1/2.84     | 1/3.45     | 1/3.54     | 1/3.56      | 1/3.42      | 1/2.77     | 70/1.06    |
| 1dtk                   | 116/-0.08  | 31/1.16    | 1/2.62     | 62/0.56     | 1/3.69      | 5/2.46     | 99/0.2     |
| 1igd                   | 1/4.21     | 1/4.16     | 1/5.16     | 1/5.54      | 1/4.26      | 1/4.69     | 3/2.26     |
| 1shf-A                 | 1/5.15     | 2/2.83     | 1/6.68     | 1/6.01      | 1/6.29      | 1/5.44     | 1/2.77     |
| 2cro                   | 416/-0.96  | 175/0.40   | 1/4.70     | 109/0.85    | 1/6.51      | 1/4.50     | 5/1.89     |
| 2ovo                   | 4/2.76     | 1/2.86     | 1/3.21     | 1/3.27      | 1/2.92      | 27/1.48    | 119/0.48   |
| 4pti                   | 157/0.20   | 13/1.75    | 1/3.96     | 5/2.18      | 1/4.72      | 1/3.47     | 157/0.17   |
| <b>lattice_ssfit</b>   |            |            |            |             |             |            |            |
| lbco                   | 1/9.79     | 1/9.47     | 1/12.09    | 1/10.80     | 1/7.36      | 1/7.95     | 1/6.37     |
| 1ctf                   | 1/6.99     | 1/7.20     | 1/10.05    | 1/7.26      | 1/8.13      | 1/6.89     | 1/4.20     |
| 1dkt-A                 | 1/6.78     | 1/6.78     | 1/6.87     | 1/6.38      | 1/4.50      | 1/4.92     | 1/4.28     |
| lfca                   | 1/5.57     | 1/3.36     | 1/7.18     | 1/6.13      | 1/5.26      | 1/5.30     | 1/3.95     |
| 1nkl                   | 1/8.33     | 1/8.16     | 1/9.29     | 1/7.15      | 1/7.15      | 1/5.83     | 1/5.64     |
| 1pgb                   | 1/8.42     | 1/6.86     | 1/11.87    | 1/8.60      | 1/9.18      | 1/9.64     | 1/3.71     |
| 1trl-A                 | 1/4.84     | 1/5.58     | 1/6.32     | 1/4.81      | 1/5.00      | 1/3.73     | 1/4.58     |
| 4icb                   | 1/6.68     | 1/5.65     | 1/7.81     | 1/6.12      | 1/7.06      | 1/4.25     | 1/4.96     |
| <b>Summary</b>         |            |            |            |             |             |            |            |
| # Correct/Total        | 22/32      | 18/32      | 27/32      | 25/32       | 27/32       | 23/32      | 15/32      |
| Z- score               | 0.83       | 2.87       | 4.27       | 3.31        | 3.91        | 3.32       | 1.87       |

**Table S1.** Native structure rankings and Z-scores for different atomistic potentials and optimized short range and 4-body coarse grained (sequential and non-sequential) potentials, for multiple decoy sets

from Decoys 'R'Us dataset.

The list of targets for which *four body optimized potential* performed poorly:

1) Small proteins: 1bg8-A (76 aa), 1bba (36 aa), 1fc2 (44 aa), 1ctf (64 aa), 1igd (61 aa), 2cro (66 aa), 1ovo (56 aa), 4pti (58 aa), 1hdd-C (57 aa)

2) Bonded or stabilized by ligands/ions: 1bl0 bound to RNA molecule, 1dtk have (20-30 heavy atoms) ligands bound and 1b0n-B is stabilized by highly charged ions (5 x Zn<sup>2+</sup>)

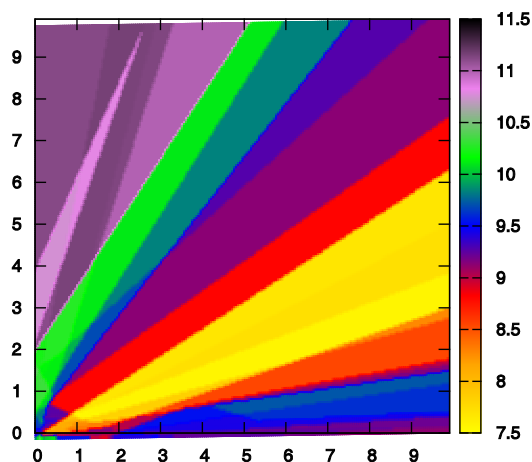

**Figure S1.** Heat map for the average RMSD for best ranked models, for template-free modeled targets from CASP8, for different weights of the four-body non-sequential and short-range potentials where the color indicates the value of RMSD(Å).

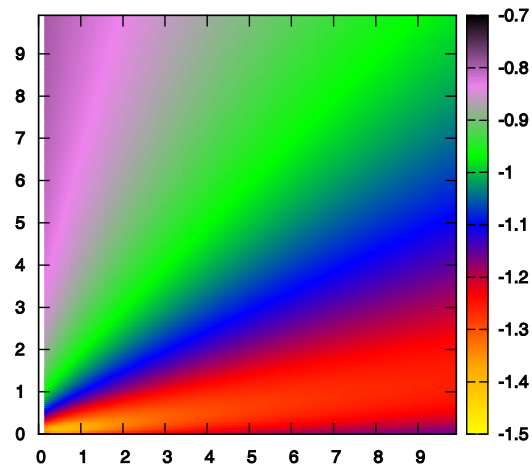

**Figure S2.** Heat map for the average Z-score for best ranked models, for homology modeled targets from CASP8, for different weights of the four-body non-sequential and short-range potentials where the color gives the value of Z-score. The scale for Z-score is negative in contrast to the scale used in the text.

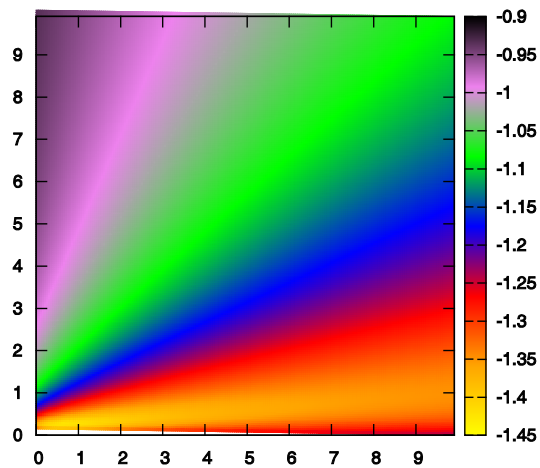

**Figure S3.** Heat map for the average Z-score for best ranked models, for template-free modeled targets from CASP8, for different weights of the four-body non-sequential and short-range potentials where the color gives the value of Z-score. The scale for Z-score is negative in contrast to the scale used in the text.

### CASP8 target data set used

#### Easy targets

T0449      T0388      T0478\_D2    T0417\_D2

|          |           |          |          |
|----------|-----------|----------|----------|
| T0450    | T0389_D1  | T0478    | T0418_D1 |
| T0451    | T0390_old | T0479    | T0418    |
| T0452_D2 | T0391_D1  | T0480    | T0419_D2 |
| T0452    | T0391_old | T0481    | T0419    |
| T0453    | T0392     | T0483    | T0421    |
| T0454_D2 | T0393_D1  | T0485    | T0422_D2 |
| T0454D2  | T0393     | T0486    | T0422    |
| T0454    | T0394     | T0487_D2 | T0423    |
| T0455    | T0395     | T0487_D3 | T0424_D2 |
| T0456_D2 | T0396     | T0487_D4 | T0424_D3 |
| T0456    | T0397_D2  | T0487_D5 | T0424    |
| T0457_D2 | T0397     | T0487    | T0425    |
| T0457    | T0398_D2  | T0488    | T0426    |
| T0459    | T0398     | T0489    | T0427_D2 |
| T0461    | T0399     | T0490    | T0427    |
| T0462_D1 | T0400     | T0491    | T0428    |
| T0462    | T0401     | T0492    | T0429_D2 |
| T0463    | T0402     | T0493    | T0429    |
| T0464    | T0404     | T0494    | T0430_D2 |
| T0466    | T0406     | T0495    | T0430    |
| T0468    | T0407_D2  | T0496    | T0431_D2 |
| T0469    | T0407     | T0497    | T0431    |
| T0470_D2 | T0408     | T0498    | T0432    |
| T0470    | T0409_D1  | T0499    | T0433    |
| T0471    | T0409     | T0501_D2 | T0434    |
| T0472_D2 | T0411     | T0501    | T0435    |
| T0472    | T0412     | T0502    | T0436    |
| T0473    | T0413     | T0503    | T0437    |
| T0474    | T0414     | T0504_D2 | T0438_D2 |
| T0475    | T0415     | T0504_D3 | T0438    |
| T0477    | T0416     | T0504    | T0440    |
| T0509    | T0445     | T0505_D1 | T0441    |
| T0510_D1 | T0446_D2  | T0505    | T0442_D2 |
| T0510    | T0446     | T0506_D2 | T0442    |
| T0511    | T0447_D1  | T0506    | T0443    |
| T0512    | T0448     | T0507    | T0444    |
| T0513    | T0514     | T0508    | T0445_D2 |

### Hard targets

|          |          |
|----------|----------|
| T0405    | T0476    |
| T0416    | T0482    |
| T0443_D2 | T0496    |
| T0443    | T0510    |
| T0460    | T0513    |
| T0465    | T0405_D2 |
